# Supplementary material
Source: publisher figshare collection journal article supplement (https://acs.figshare.com/ndownloader/files/3588141)
Supplement: Supplementary file 1 [file 3588141]

Supporting information for “Insight into G-DNA Structural Polymorphism and Folding from Sequence and Loop Connectivity through Free Energy Analysis” *J. Amer. Chem. Soc.* (2011), <http://dx.doi.org/10.1021/ja107805r> by Xiaohui Cang, Jiří Šponer, and Thomas E. Cheatham, III.

Table S1. Free energies (kcal/mol) calculated using the MM-PBSA method for the single-loop models.

| model                             | time interval | $G_{\text{total}}$ |       | $G_{\text{stem}}$ |       | $G_{\text{loop}}$ |       | $\Delta G_{\text{total}}$ | $\Delta G_{\text{loop}}$ | –TS<br>(Nmode) | –TS<br>(quasi-harmonic) |
|-----------------------------------|---------------|--------------------|-------|-------------------|-------|-------------------|-------|---------------------------|--------------------------|----------------|-------------------------|
| T-L <sub>n</sub>                  | 40-50ns       | -2848.5            | ± 2.5 | -2647.0           | ± 2.3 | -201.5            | ± 0.6 | <u>7</u>                  | 0                        | -354.0         | -121.2                  |
| T-P <sub>3a</sub>                 | 40-50ns       | -2855.2            | ± 2.0 | -2653.7           | ± 1.9 | -201.5            | ± 0.6 | <u>0</u>                  | 0                        | -355.1         | -124.5                  |
| T-P <sub>3p</sub>                 | 40-50ns       | -2829.4            | ± 2.0 | -2626.3           | ± 1.9 | -203.1            | ± 0.6 | 26                        | <u>-2</u>                |                |                         |
| T-P <sub>2a</sub>                 | 11-21ns       | -1790.9            | ± 1.5 | -1600.4           | ± 1.5 | -190.5            | ± 0.7 |                           | 11                       |                |                         |
| T-P <sub>2a</sub>                 | 35-45ns       | -1790.4            | ± 1.7 | -1599.4           | ± 1.4 | -191.0            | ± 0.7 |                           | <u>11</u>                |                |                         |
| T-P <sub>4a</sub> <sup>†</sup>    | 40-50ns       | -3904.1            | ± 2.6 | -3694.2           | ± 2.5 | -209.9            | ± 0.7 |                           | -8                       |                |                         |
| T <sub>2</sub> -L <sub>n</sub>    | 40-50ns       | -3003.0            | ± 2.0 | -2657.6           | ± 1.9 | -345.4            | ± 0.8 | <u>2</u>                  | 3                        | -377.7         | -127.3                  |
| T <sub>2</sub> -L <sub>w</sub> *  | 40-50ns       | -3007.2            | ± 1.8 | -2652.8           | ± 1.6 | -354.4            | ± 0.9 | -3                        | -6                       |                |                         |
| T <sub>2</sub> -L <sub>w</sub> -2 | 40-50ns       | -3000.5            | ± 2.3 | -2648.2           | ± 2.2 | -352.3            | ± 0.9 | <u>4</u>                  | -4                       | -377.1         | -126.5                  |
| T <sub>2</sub> -P <sub>3a</sub>   | 40-50ns       | -3004.6            | ± 2.1 | -2655.9           | ± 2.2 | -348.7            | ± 0.9 | <u>0</u>                  | 0                        | -380.4         | -124.1                  |
| T <sub>2</sub> -P <sub>3p</sub>   | 15-25ns       | -2978.6            | ± 2.1 | -2634.0           | ± 1.7 | -344.6            | ± 2.4 | 26                        | <u>4</u>                 |                |                         |
| T <sub>2</sub> -P <sub>3p</sub>   | 38-48ns       | -2972.1            | ± 2.5 | -2630.2           | ± 2.2 | -341.9            | ± 0.9 | 33                        | 7                        |                |                         |
| T <sub>2</sub> -P <sub>2a</sub>   | 5-15ns        | -1938.3            | ± 2.0 | -1604.2           | ± 1.7 | -334.1            | ± 0.9 |                           | 15                       |                |                         |
| T <sub>2</sub> -P <sub>2a</sub>   | 18-26ns       | -1936.8            | ± 1.8 | -1601.6           | ± 1.7 | -335.2            | ± 0.8 |                           | <u>13</u>                |                |                         |
| T <sub>2</sub> -P <sub>2a</sub>   | 40-50ns       | -1934.4            | ± 2.2 | -1599.4           | ± 2.0 | -335.0            | ± 1.0 |                           | 14                       |                |                         |
| T <sub>2</sub> -P <sub>4a</sub>   | 40-50ns       | -4054.2            | ± 2.2 | -3704.0           | ± 2.0 | -350.2            | ± 0.9 |                           | -2                       |                |                         |
| T <sub>2</sub> -P <sub>4p</sub>   | 15-25ns       | -4043.4            | ± 2.9 | -3696.5           | ± 2.6 | -346.9            | ± 0.9 |                           | <u>2</u>                 |                |                         |
| T <sub>3</sub> -L <sub>n</sub>    | 40-50ns       | -3150.7            | ± 2.5 | -2656.7           | ± 2.2 | -494.0            | ± 1.1 | <u>-5</u>                 | -3                       | -401.8         | -129.7                  |
| T <sub>3</sub> -L <sub>w</sub>    | 17-27ns       | -3149.7            | ± 2.5 | -2652.3           | ± 2.1 | -497.4            | ± 1.2 | -4                        | -6                       |                |                         |
| T <sub>3</sub> -L <sub>w</sub>    | 40-50ns       | -3155.2            | ± 2.1 | -2657.9           | ± 2.0 | -497.3            | ± 1.0 | <u>-9</u>                 | -6                       | -402.0         | -128.6                  |
| T <sub>3</sub> -L <sub>w</sub> -2 | 40-50ns       | -3151.0            | ± 2.8 | -2658.0           | ± 2.4 | -493.0            | ± 1.3 | -5                        | -2                       | -401.3         |                         |
| T <sub>3</sub> -D                 | 40-50ns       | -3145.4            | ± 2.5 | -2651.9           | ± 2.1 | -493.5            | ± 1.2 | <u>1</u>                  | -3                       | -403.3         | -132.1                  |
| T <sub>3</sub> -P <sub>3a</sub>   | 40-50ns       | -3145.9            | ± 2.0 | -2655.0           | ± 1.9 | -490.9            | ± 1.0 | <u>0</u>                  | 0                        | -403.8         | -126.8                  |
| T <sub>3</sub> -P <sub>3p</sub>   | 40-50ns       | -3124.4            | ± 2.4 | -2634.0           | ± 2.3 | -490.4            | ± 1.0 | 22                        | <u>1</u>                 |                |                         |
| T <sub>3</sub> -P <sub>2a</sub>   | 30-40ns       | -2080.8            | ± 1.9 | -1602.4           | ± 1.7 | -478.4            | ± 1.0 |                           | <u>13</u>                |                |                         |
| T <sub>3</sub> -P <sub>4a</sub>   | 40-50ns       | -4191.9            | ± 2.5 | -3702.4           | ± 2.2 | -489.5            | ± 1.2 |                           | <u>1</u>                 |                |                         |

|                                    |         |         |       |         |       |        |       |                   |                  |
|------------------------------------|---------|---------|-------|---------|-------|--------|-------|-------------------|------------------|
| T <sub>3</sub> -P <sub>4p</sub>    | 40-50ns | -4182.9 | ± 2.6 | -3691.0 | ± 2.4 | -491.9 | ± 1.2 |                   | <b><u>-1</u></b> |
| TTA-L <sub>n</sub>                 | 40-50ns | -3195.7 | ± 2.4 | -2653.9 | ± 2.3 | -541.8 | ± 1.1 | <b><u>-4</u></b>  | -8               |
| TTA-L <sub>w</sub>                 | 20-30ns | -3196.0 | ± 2.0 | -2652.7 | ± 1.8 | -543.3 | ± 1.0 | -4                | -10              |
| TTA-L <sub>w</sub>                 | 40-50ns | -3197.4 | ± 2.3 | -2654.9 | ± 2.0 | -542.5 | ± 1.1 | <b><u>-5</u></b>  | -9               |
| TTA-D                              | 30-40ns | -3190.3 | ± 1.8 | -2650.0 | ± 1.6 | -540.3 | ± 1.3 | <b><u>2</u></b>   | -7               |
| TTA-P <sub>3a</sub>                | 40-50ns | -3192.2 | ± 2.4 | -2658.7 | ± 2.2 | -533.5 | ± 1.1 | <b><u>0</u></b>   | 0                |
| TTA-P <sub>3p</sub>                | 30-40ns | -3159.4 | ± 2.4 | -2629.0 | ± 2.2 | -530.4 | ± 1.1 | 33                | <b><u>3</u></b>  |
| TTA-P <sub>2a</sub>                | 40-50ns | -2128.9 | ± 2.2 | -1604.4 | ± 1.9 | -524.5 | ± 1.2 |                   | <b><u>9</u></b>  |
| TTA-P <sub>4a</sub>                | 40-50ns | -4238.5 | ± 2.8 | -3701.9 | ± 2.7 | -536.6 | ± 1.0 |                   | <b><u>-3</u></b> |
| TTA-P <sub>4p</sub>                | 40-50ns | -4215.3 | ± 2.6 | -3687.4 | ± 2.0 | -527.9 | ± 1.4 |                   | <b><u>6</u></b>  |
| T <sub>4</sub> -L <sub>n</sub>     | 40-50ns | -3291.1 | ± 2.4 | -2656.0 | ± 2.2 | -635.1 | ± 1.2 | <b><u>-7</u></b>  | -6               |
| T <sub>4</sub> -L <sub>n</sub> -2  | 40-50ns | -3286.5 | ± 2.2 | -2653.0 | ± 1.8 | -633.5 | ± 1.1 | -3                | -4               |
| T <sub>4</sub> -L <sub>w</sub>     | 40-50ns | -3303.2 | ± 2.3 | -2660.4 | ± 1.9 | -642.8 | ± 1.2 | <b><u>-19</u></b> | -14              |
| T <sub>4</sub> -L <sub>w</sub> -2  | 40-50ns | -3298.7 | ± 2.3 | -2657.2 | ± 2.0 | -641.5 | ± 1.1 | -15               | -12              |
| T <sub>4</sub> -L <sub>w</sub> -3* | 40-50ns | -3307.8 | ± 2.0 | -2660.4 | ± 1.9 | -647.4 | ± 1.1 | -24               | -18              |
| T <sub>4</sub> -D                  | 40-50ns | -3293.7 | ± 2.8 | -2659.3 | ± 2.5 | -634.4 | ± 1.1 | <b><u>-10</u></b> | -5               |
| T <sub>4</sub> -P <sub>3a</sub>    | 40-50ns | -3283.9 | ± 2.1 | -2654.7 | ± 1.9 | -629.2 | ± 1.1 | <b><u>0</u></b>   | 0                |
| T <sub>4</sub> -P <sub>3p</sub>    | 30-40ns | -3264.1 | ± 2.1 | -2634.7 | ± 2.0 | -629.4 | ± 1.3 | 20                | 0                |
| T <sub>4</sub> -P <sub>3p</sub>    | 40-50ns | -3262.1 | ± 2.6 | -2630.0 | ± 2.3 | -632.1 | ± 1.3 | 22                | <b><u>-3</u></b> |
| T <sub>4</sub> -P <sub>2a</sub>    | 40-50ns | -2230.0 | ± 1.9 | -1602.7 | ± 1.5 | -627.3 | ± 1.2 |                   | <b><u>2</u></b>  |
| T <sub>4</sub> -P <sub>4a</sub>    | 40-50ns | -4340.1 | ± 2.7 | -3703.8 | ± 2.3 | -636.3 | ± 1.3 |                   | <b><u>-7</u></b> |
| T <sub>4</sub> -P <sub>4p</sub>    | 40-50ns | -4316.0 | ± 2.5 | -3682.7 | ± 2.2 | -633.3 | ± 1.7 |                   | <b><u>-4</u></b> |

The data shown in bold and with underscores are used for relative rankings and are shown in the main manuscript in Table 1.

The T-L<sub>w</sub>, T-D, T-P<sub>4p</sub> and T<sub>2</sub>-D models were unstable in the MD simulations, so these models are not included in the table.

All of the non-residue loop models (i.e. where the two strands are directly bonded without any intervening residues) were unstable except 0-P<sub>3p</sub>, therefore free energies were not calculated for those models.

\*: The extreme stability for the over-stacked loop geometry may be an artifact of the current force field (ff99+parmbsc0).

†: The abnormal geometry of the sugar ring of the loop-connecting stem residue makes the  $\Delta G_{\text{loop}}$  value misleading, therefore the data of T-P<sub>4a</sub> is not shown in the main manuscript Table 1.

Entropies were calculated with both normal mode and quasi-harmonic methods for a subset of the models to demonstrate that the solution entropies do not significantly affect the relative ranking of different loop types.

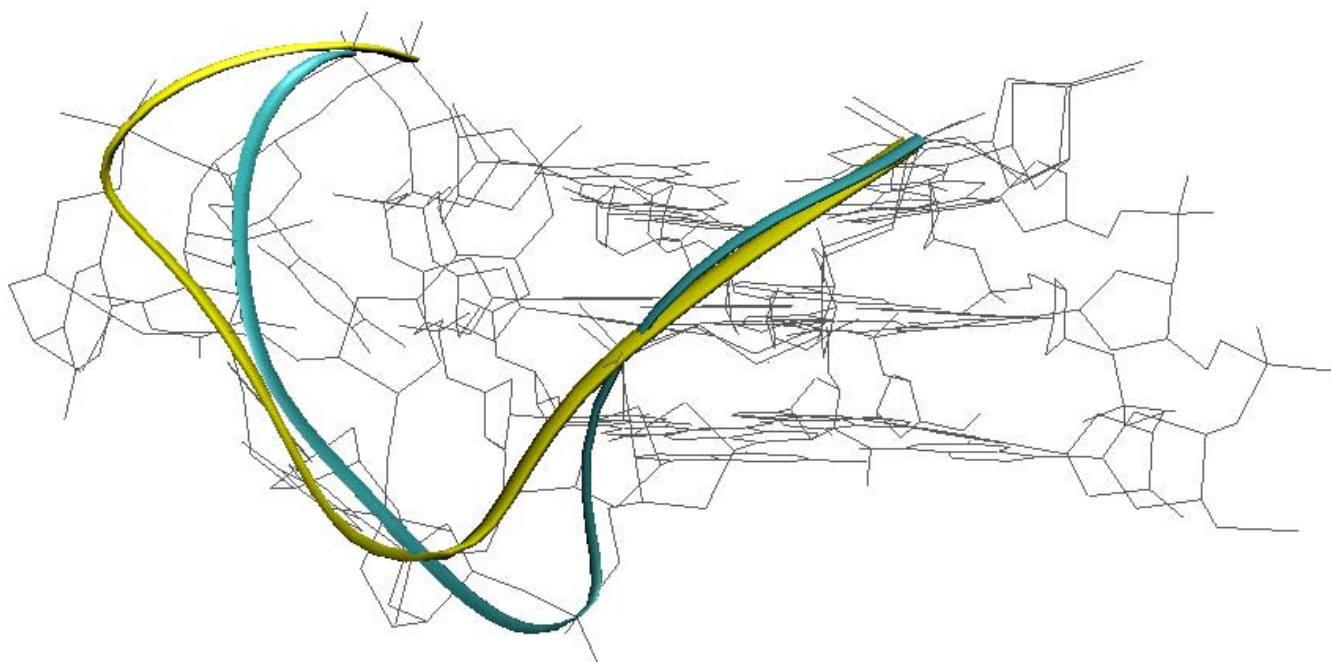

**Figure S1: Backbone differences for the parallel and anti-parallel propeller dTTA loops.** The loop and strand direction follows that of Figure 2 in the main text. Yellow: the parallel propeller loop (from the crystal structure 1KF1); cyan: the anti-parallel propeller loop (from the NMR structure 2GKU). Compared to the anti-parallel reversal loop, the parallel reversal loop is more flat and the final loop residue is further way from the connecting stem residue.

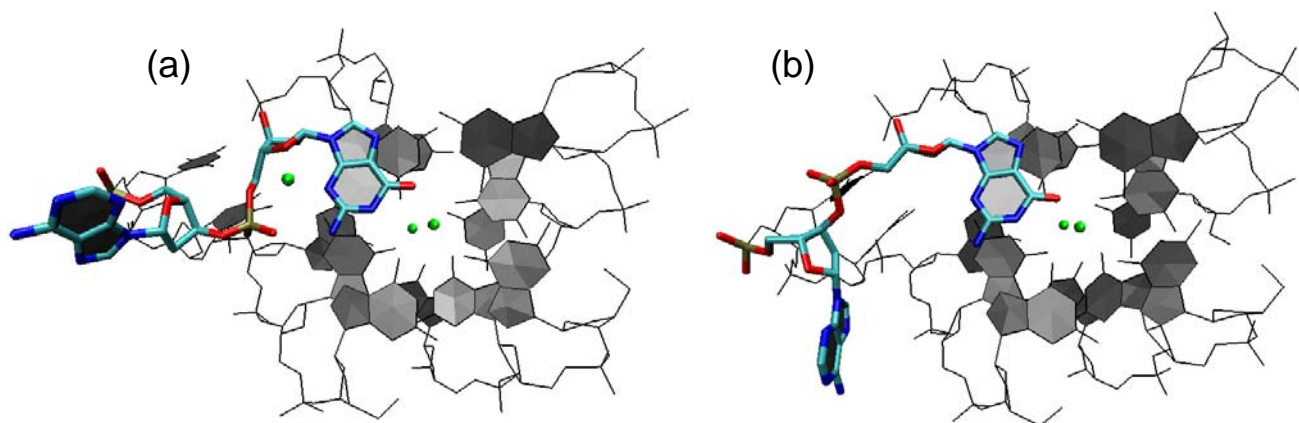

**Figure S2. The stable cation binding site specific for the anti-parallel propeller loop models.** The cation binding site is formed from the phosphate group, O4' atom and N3 atom of the *syn* dG residue connected with the 3' side of the propeller loop. (a) When the phosphate group is close to the other atoms, the binding site forms; (b) When the loop changed to a geometry that moved the phosphate group away the ion leaves quickly.

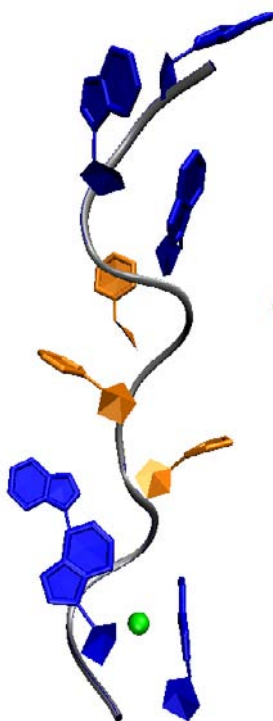

**Figure S3: The extended structure of the linear sequence d(GGGTTTGGG) at the end of 500ps MD simulation.** The guanine residues are shown in blue; the thymine residues are shown in orange; and the two closest  $K^+$  cations are shown as green spheres.

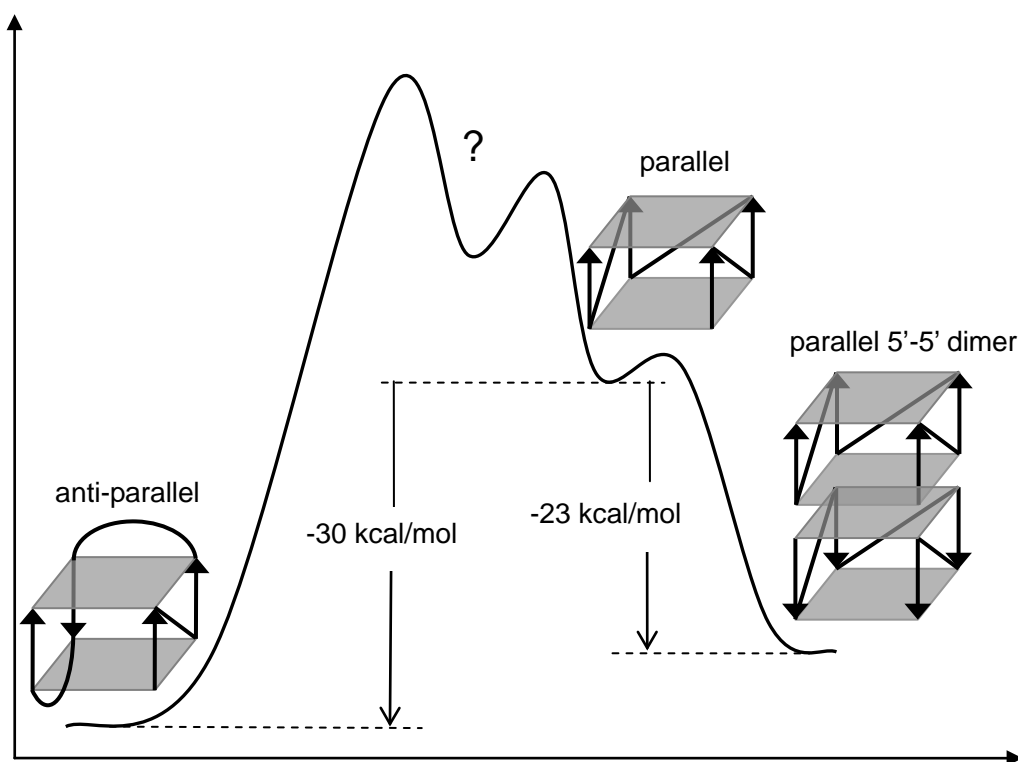

**Figure S4. Hypothetical energy curves between anti-parallel monomer, parallel monomer and parallel 5'-5' dimer of human telomeric G-quadruplexes.** When the loops are not very short anti-parallel structures are more stable than parallel structures. However, parallel structures can be favored through multimer formation. The balance between inter-conversions of anti-parallel and parallel structures is still unclear.
